# Supplementary material for: Arrowroot and Cassava Mixed Starch Products Identification by Raman Analysis with Chemometrics
Source: MDPI journal article supplement (doi:10.3390/polysaccharides2030043), 2021-09-18
Supplement: s1 [file s1]

Table S1. K-means classification results for arrowroot and cassava in groups 1, 2 and 3.

| <b>Sample<br/>label</b> | <b>K-means<br/>results</b> |
|-------------------------|----------------------------|
| A1                      | 3                          |
| A2                      | 2                          |
| A3                      | 3                          |
| A4                      | 3                          |
| A5                      | 2                          |
| A6                      | 2                          |
| A7                      | 2                          |
| A8                      | 3                          |
| A9                      | 1                          |
| A10                     | 1                          |
| C1                      | 1                          |
| C2                      | 1                          |
| C3                      | 1                          |
| C4                      | 1                          |
| C5                      | 1                          |
| C6                      | 1                          |
| C7                      | 1                          |
| C8                      | 1                          |
| C9                      | 1                          |
| C10                     | 2                          |
| C11                     | 2                          |
| C12                     | 2                          |
| C13                     | 2                          |
| C14                     | 2                          |
| C15                     | 2                          |
| C16                     | 2                          |
| C17                     | 2                          |
| C18                     | 2                          |
| C19                     | 2                          |
| C20                     | 2                          |
| C21                     | 2                          |
| C22                     | 2                          |
| C23                     | 2                          |
| C24                     | 2                          |
| C25                     | 2                          |
| C26                     | 3                          |
| C27                     | 2                          |
| C28                     | 2                          |
| C29                     | 2                          |
| C30                     | 2                          |
| C31                     | 2                          |
| C32                     | 2                          |
| C33                     | 2                          |

|     |   |
|-----|---|
| C34 | 2 |
| C35 | 2 |
| C36 | 2 |
| C37 | 2 |
| C38 | 2 |
| C39 | 2 |
| C40 | 2 |
| C41 | 2 |
| C42 | 2 |
| C43 | 2 |
| C44 | 2 |
| C45 | 2 |
| C46 | 2 |
| C47 | 2 |
| C48 | 2 |
| C49 | 2 |
| C50 | 2 |
| C51 | 2 |
| C52 | 2 |
| C53 | 2 |
| C54 | 2 |
| C55 | 2 |
| C56 | 1 |
| C57 | 1 |
| C58 | 1 |
| C59 | 1 |
| C60 | 1 |
| C61 | 1 |
| C62 | 1 |
| C63 | 1 |
| C64 | 1 |
| C65 | 1 |
| C66 | 1 |
| C67 | 1 |
| C68 | 1 |
| C69 | 1 |
| C70 | 1 |
| C71 | 1 |
| C72 | 1 |
| C73 | 1 |
| C74 | 1 |
| C75 | 1 |
| C76 | 1 |
| C77 | 1 |
| C78 | 1 |
| C79 | 1 |

|     |   |
|-----|---|
| C80 | 3 |
| C81 | 1 |
| C82 | 1 |
| C83 | 1 |
| C84 | 1 |
| C85 | 1 |
| C86 | 1 |
| C87 | 1 |
| C88 | 1 |

---
